# Supplementary material for: Developing Gut Microbiota Exerts Colonisation Resistance to Clostridium (syn. Clostridioides) difficile in Piglets
Source: Microorganisms. 2019 Jul 26;7(8):218. doi: 10.3390/microorganisms7080218 (PMC6723027; doi:10.3390/microorganisms7080218)

Phylogenetic tree – ( weighted\_unifrac distance )

Group

- Sows
- Suckling piglets (SP)
- Weaned piglets (WP)

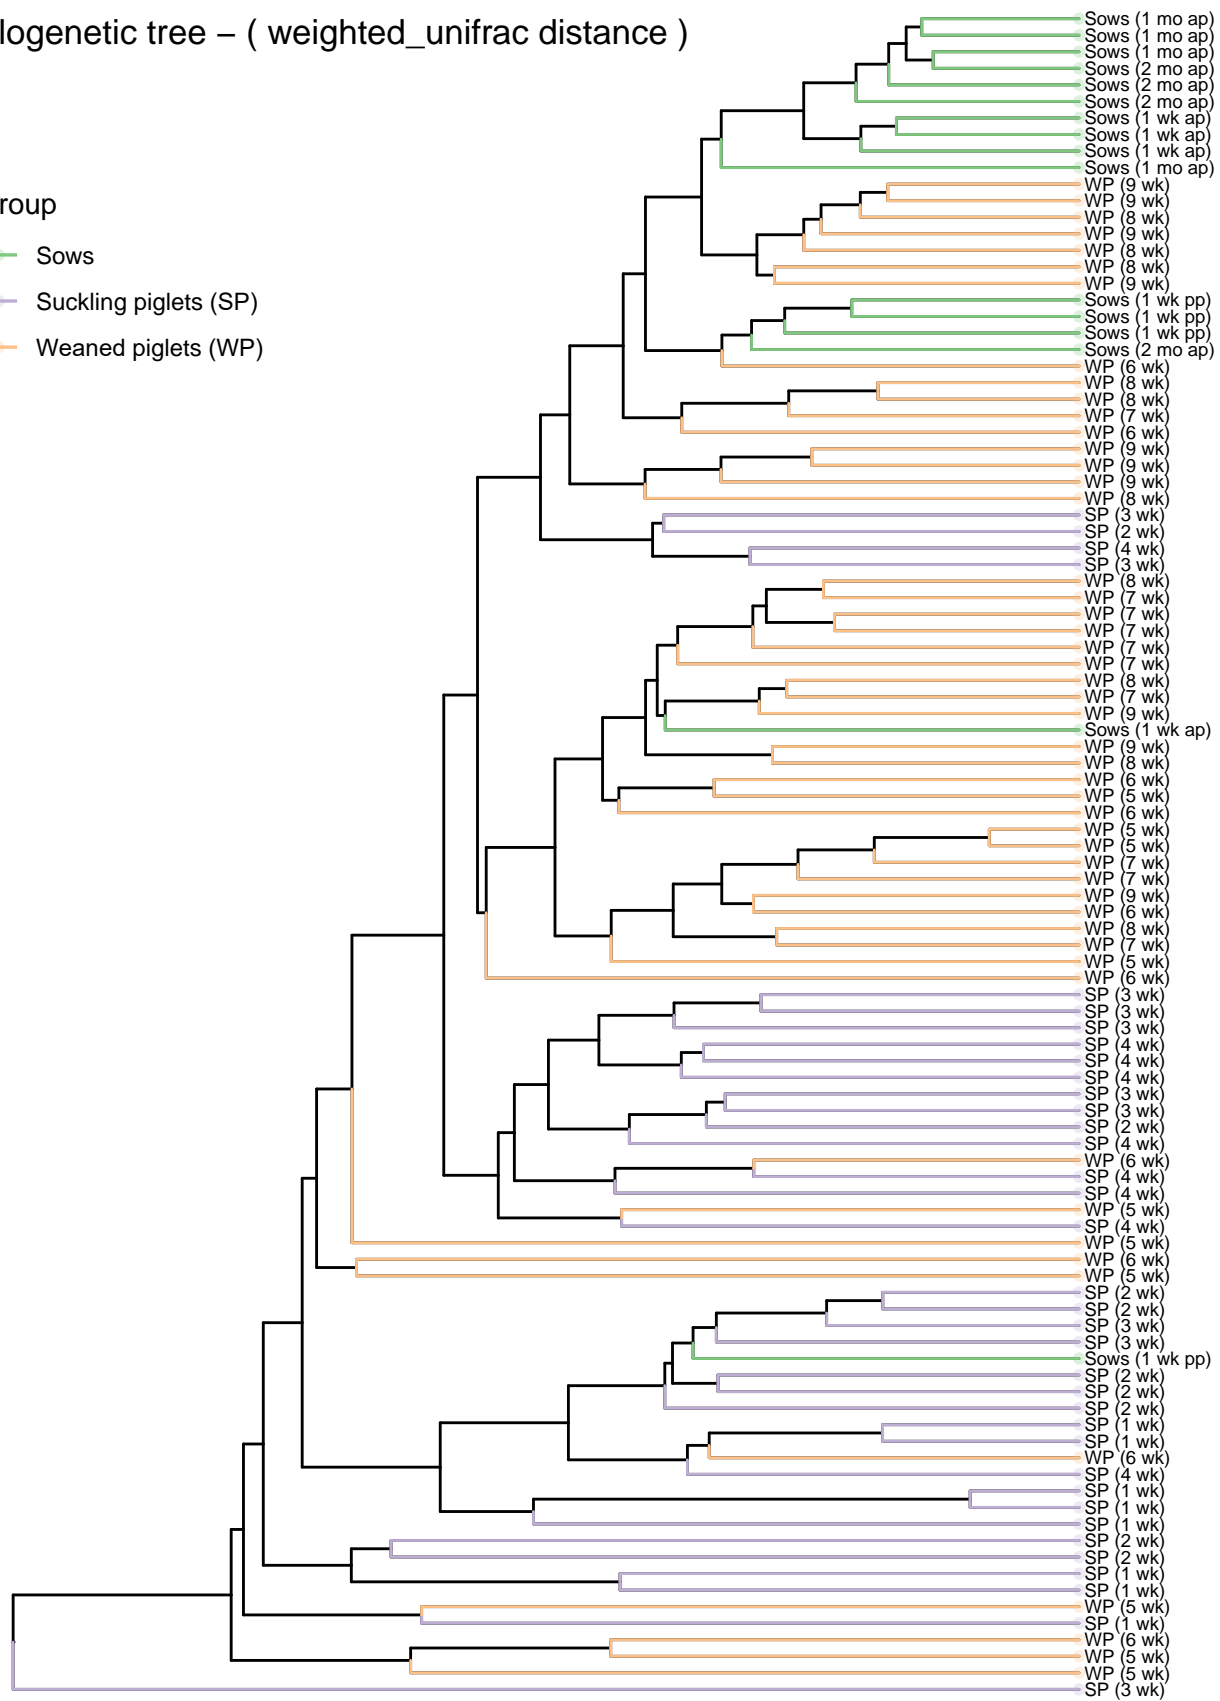

Supplement: Supplementary file 1 [file microorganisms-07-00218-s001.zip › Supplementary Figure 1b.pdf]
