# Supplementary material for: Developing Gut Microbiota Exerts Colonisation Resistance to Clostridium (syn. Clostridioides) difficile in Piglets
Source: Microorganisms. 2019 Jul 26;7(8):218. doi: 10.3390/microorganisms7080218 (PMC6723027; doi:10.3390/microorganisms7080218)
Supplement: Supplementary file 1 [file microorganisms-07-00218-s001.zip › Supplementary Table 1.xlsx]

## Sheet: Sheet 1
Supplementary Table 1. List of bacterial genera unique and shared between sows, suckling and weaned piglets, as analysed by 16S rDNA gene sequencing.
Sows&Suckling.piglets&Weaned.piglets	Suckling.piglets&Weaned.piglets	Sows&Weaned.piglets	Weaned.piglets	Sows&Suckling.piglets	Suckling.piglets	Sows
Lactobacillus	Cloacibacillus	Ruminococcaceae.UCG.008	Clostridium.sensu.stricto.6	Peptostreptococcus	Actinomyces	Lachnospiraceae.UCG.007
Clostridium.sensu.stricto.1	Chlamydia	Agathobacter	Anaerostipes	Erysipelatoclostridium	Actinobacillus	Lachnospiraceae.UCG.006
BacteroidalesXXXX	UBA1819	SelenomonadalesXXXX	Catenibacterium	Luteococcus	S5.A14a	Anaerococcus
Christensenellaceae.R.7.group	Veillonella	Shuttleworthia	Fusicatenibacter	Arcanobacterium	Clostridium.sensu.stricto.2	Lachnoclostridium.10
ClostridialesXXXX	Alistipes	Lachnospiraceae.NK3A20.group	unidentified.rumen.bacterium.RF39	Corynebacterium	Pseudomonas	Aerococcus
Ruminococcaceae.UCG.002	Faecalicoccus	Syntrophococcus	CAG.873	Succiniclasticum	CHKCI001	Lachnospiraceae.UCG.008
Streptococcus	Lachnospiraceae.UCG.010	Eubacterium..ruminantium.group	LactobacillalesXXXX	Cerasicoccus	Staphylococcus	Breznakia
Terrisporobacter	Hungatella	Dialister	Eubacterium..ventriosum.group	Pediococcus	Epulopiscium	Anaeroplasma
Blautia	CAG.56	WCHB1.41XXXX	Lachnospiraceae.NC2004.group	Finegoldia	Defluviitaleaceae.UCG.011	horsej.a03
Ruminococcaceae.UCG.005	Butyricimonas	Lachnospira	Lachnospiraceae.UCG.003	Kocuria	Clostridioides	Clostridium.sp..CAG.306
Bacteroides	Pyramidobacter	Selenomonas	AeromonadalesXXXX	Cutibacterium	Lawsonella	Ezakiella
Eubacterium..coprostanoligenes.group	Howardella	Pseudoramibacter	Brachyspira		Globicatella	Porphyromonas
Romboutsia	Erysipelotrichaceae.UCG.006	Burkholderiales.bacterium.Beta_02	Parasutterella		Pasteurella
Ruminococcaceae.NK4A214.group	Ruminococcaceae.UCG.003	Tyzzerella.4	SP3.e08		Clostridium..innocuum.group
Ruminococcus.2	Hydrogenoanaerobacterium	Eubacterium..eligens.group			DNF00809
Coprococcus.3	Eubacterium..saphenum.group	Selenomonas.1			Flavonifractor
Lachnoclostridium	Christensenella	Quinella			Mannheimia
ErysipelotrichalesXXXX	Bilophila	Anaerosporobacter			Moraxella
Escherichia.Shigella	Negativibacillus	RhodospirillalesXXXX			Dielma
Phascolarctobacterium	Synergistes	BetaproteobacterialesXXXX			Mailhella
Bifidobacterium	Sutterella	Fibrobacter			Eggerthella
Turicibacter	Anaerofustis	Mycoplasma			Phaseolus.acutifolius..tepary.bean.
Family.XIII.AD3011.group	Acetanaerobacterium	unidentified.rumen.bacterium.RFP12			Tyzzerella
Ruminococcaceae.UCG.014	GCA.900066575	Ruminiclostridium.1			CorynebacterialesXXXX
Prevotellaceae.NK3B31.group	Pseudoflavonifractor	unidentified.rumen.bacterium.RF9			Holdemania
Ruminococcus.1	Gardnerella	Candidatus.Gastranaerophilales.bacterium.Zag_111			Negativicoccus
Subdoligranulum	Sanguibacteroides	Coprococcus.2			Neisseria
Lachnospiraceae.XPB1014.group	SAR324.clade.Marine.group.B.XXXX	Candidatus.Melainabacteria.bacterium.MEL.A1			Trueperella
Marvinbryantia	Candidatus.Arthromitus	Butyrivibrio			Peptoniphilus
Ruminococcus..gauvreauii.group	DesulfovibrionalesXXXX	Succinivibrionaceae.UCG.001			RickettsialesXXXX
uncultured.rumen.bacteriumXXXX		Propioniciclava			Citrobacter
Treponema.2		Erysipelotrichaceae.UCG.003			Anaerofilum
Rikenellaceae.RC9.gut.group		Papillibacter			Gemella
Eubacterium..hallii.group		Clostridium.sensu.stricto.13			Helcococcus
Fusobacterium		Pygmaiobacter			Prevotella
Lachnospiraceae.NK4A136.group		Angelakisella			Granulicatella
Megasphaera					Leuconostoc
CoriobacterialesXXXX					Anaerotruncus
Ruminococcaceae.UCG.004					PropionibacterialesXXXX
Faecalibacterium
Dorea
Roseburia
Collinsella
Alloprevotella
Coprococcus.1
Olsenella
Prevotella.9
Prevotella.1
Eubacterium..fissicatena.group
Holdemanella
Oribacterium
Erysipelotrichaceae.UCG.002
Ruminococcaceae.UCG.010
Rothia
Intestinimonas
Ruminococcaceae.UCG.013
Oscillospira
Ruminiclostridium.9
Fournierella
Mogibacterium
Eubacterium..nodatum.group
Prevotella.2
Parabacteroides
Catenisphaera
Solobacterium
Oscillibacter
Enterococcus
Candidatus.Soleaferrea
Prevotellaceae.UCG.001
Candidatus.Saccharimonas
Mitsuokella
Ruminococcus..gnavus.group
Mollicutes.RF39XXXX
Lachnospiraceae.FCS020.group
Lachnospiraceae.AC2044.group
Eisenbergiella
Intestinibacter
GastranaerophilalesXXXX
Desulfovibrio
Succinivibrio
Sharpea
Lachnospiraceae.ND3007.group
Ruminiclostridium.5
Eubacterium..xylanophilum.group
Prevotellaceae.UCG.003
X__XXXX
Anaerovibrio
Peptococcus
Enterorhabdus
Ruminococcus..torques.group
Prevotella.7
Acetitomaculum
p.1088.a5.gut.group
Campylobacter
Prevotellaceae.UCG.004
Lachnospiraceae.UCG.001
Butyricicoccus
Ruminococcaceae.UCG.009
Sphaerochaeta
Ruminiclostridium.6
Cellulosilyticum
metagenome
Moryella
Family.XIII.UCG.001
dgA.11.gut.group
BradymonadalesXXXX
Acidaminococcus
Corynebacterium.1
GCA.900066225
Eubacterium..brachy.group
Asteroleplasma
Senegalimassilia
Lachnospiraceae.NK4B4.group
Akkermansia
Weissella
Erysipelotrichaceae.UCG.004
Anaerorhabdus..furcosa.group
Helicobacter
Plantibacter
gut.metagenome
Paraeggerthella
Allisonella
Atopobium
Slackia
XBB1006
Caproiciproducens
Ruminiclostridium
Parvimonas
Denitrobacterium
Elusimicrobium
ChloroplastXXXX
Ruminococcaceae.V9D2013.group
Microbacterium
Z20
Oxalobacter
