# Supplementary material for: Developing Gut Microbiota Exerts Colonisation Resistance to Clostridium (syn. Clostridioides) difficile in Piglets
Source: Microorganisms. 2019 Jul 26;7(8):218. doi: 10.3390/microorganisms7080218 (PMC6723027; doi:10.3390/microorganisms7080218)
Supplement: Supplementary file 1 [file microorganisms-07-00218-s001.zip › Supplementary Table 2.xlsx]

## Sheet: Sheet3
animal ID	age	C. difficile log copy/g (without sample enrichment)	C. difficile, positive (+) or negative (-) qPCR signal after sample enrichment
sow 66	2 mo ap	-	-
sow 66	1 mo ap	-	-
sow 66	1 wk ap	2.99829
sow 66	1 wk pp	-	-
sow 69	2 mo ap	-	-
sow 69	1 mo ap	2.26142
sow 69	1 wk ap	-	-
sow 69	1 wk pp	-	-
sow 73	2 mo ap	-	-
sow 73	1 mo ap	-	-
sow 73	1 wk ap	-	+
sow 73	1 wk pp	3.76673
sow 74	2 mo ap	-	-
sow 74	1 mo ap	-	+
sow 74	1 wk ap	-	-
sow 74	1 wk pp	3.35447
