# Supplementary figures and images for: Developing Gut Microbiota Exerts Colonisation Resistance to Clostridium (syn. Clostridioides) difficile in Piglets
Source: MDPI journal article supplement (doi:10.3390/microorganisms7080218), 2019-07-26

## Phylogenetic tree – ( unweighted\_unifrac distance )

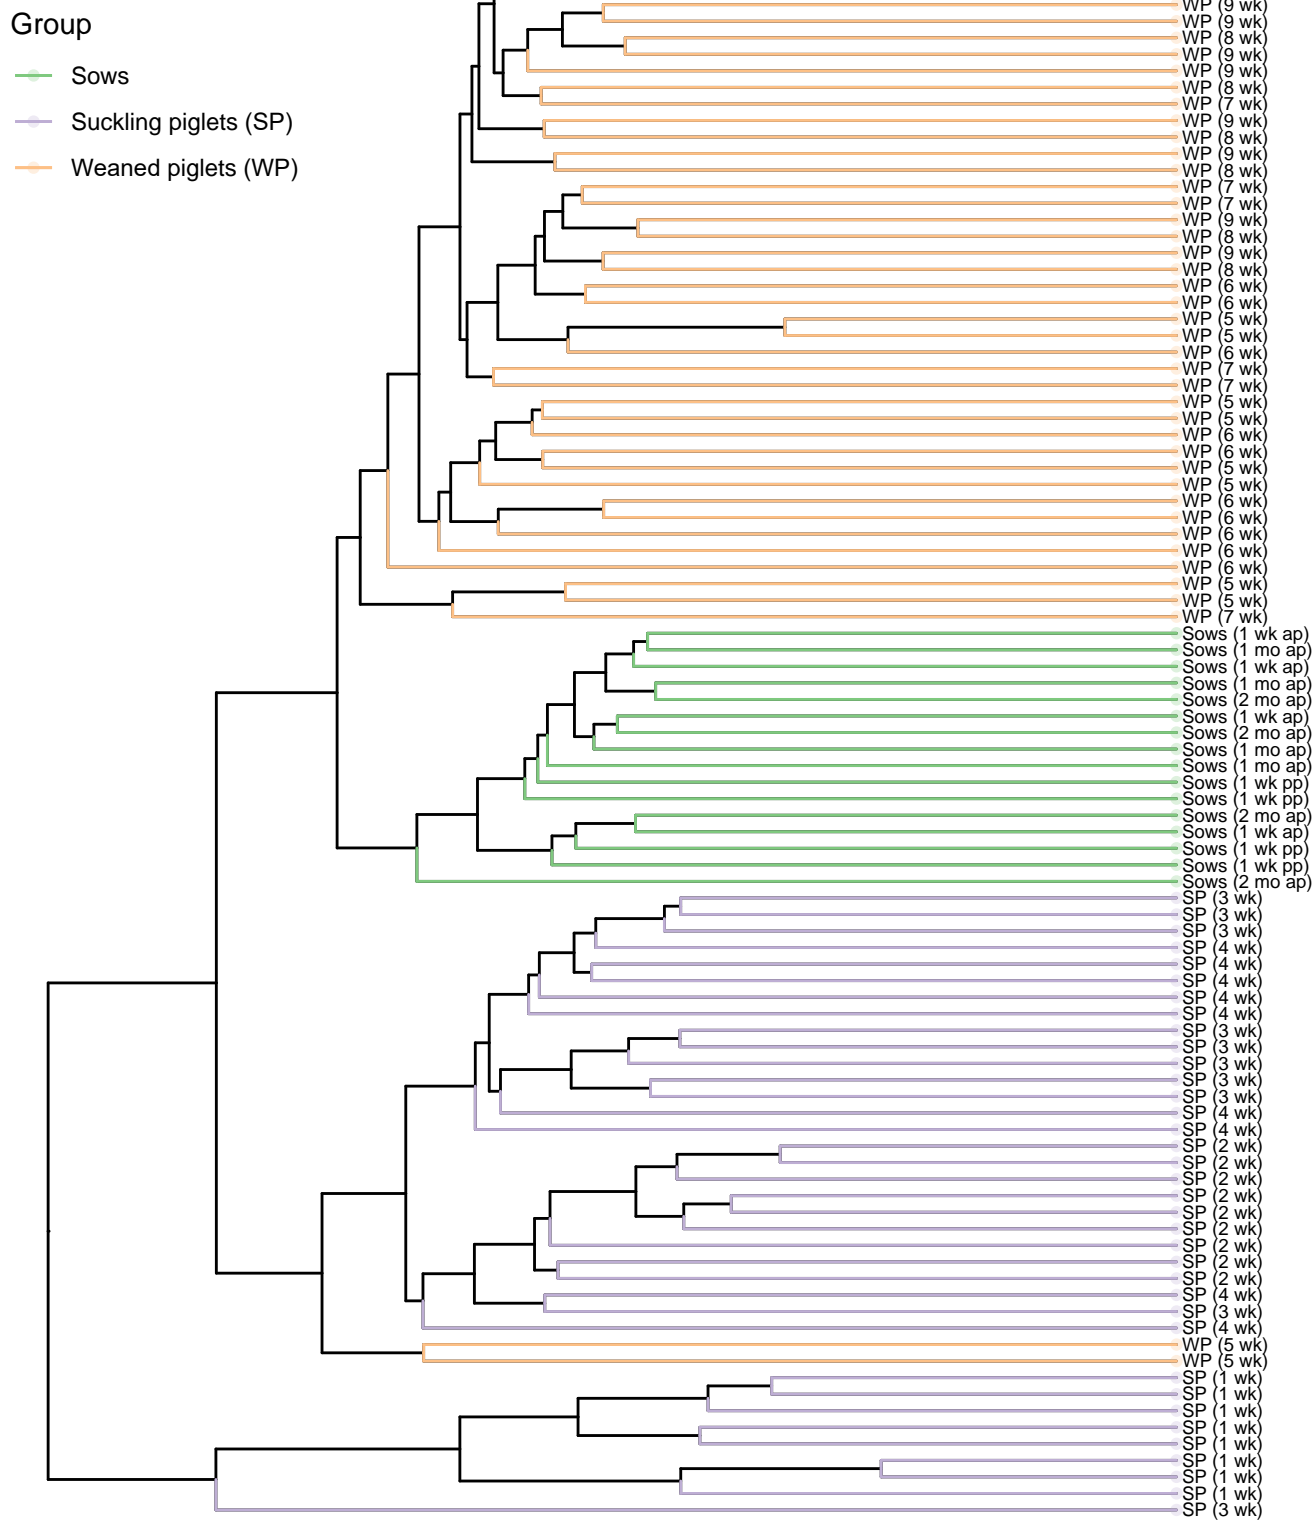

Supplement: s1 [file s1]

## Phylogenetic tree – ( weighted\_unifrac distance )

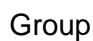

 Sows

— Suckling piglets (SP)

— Weaned piglets (WP)

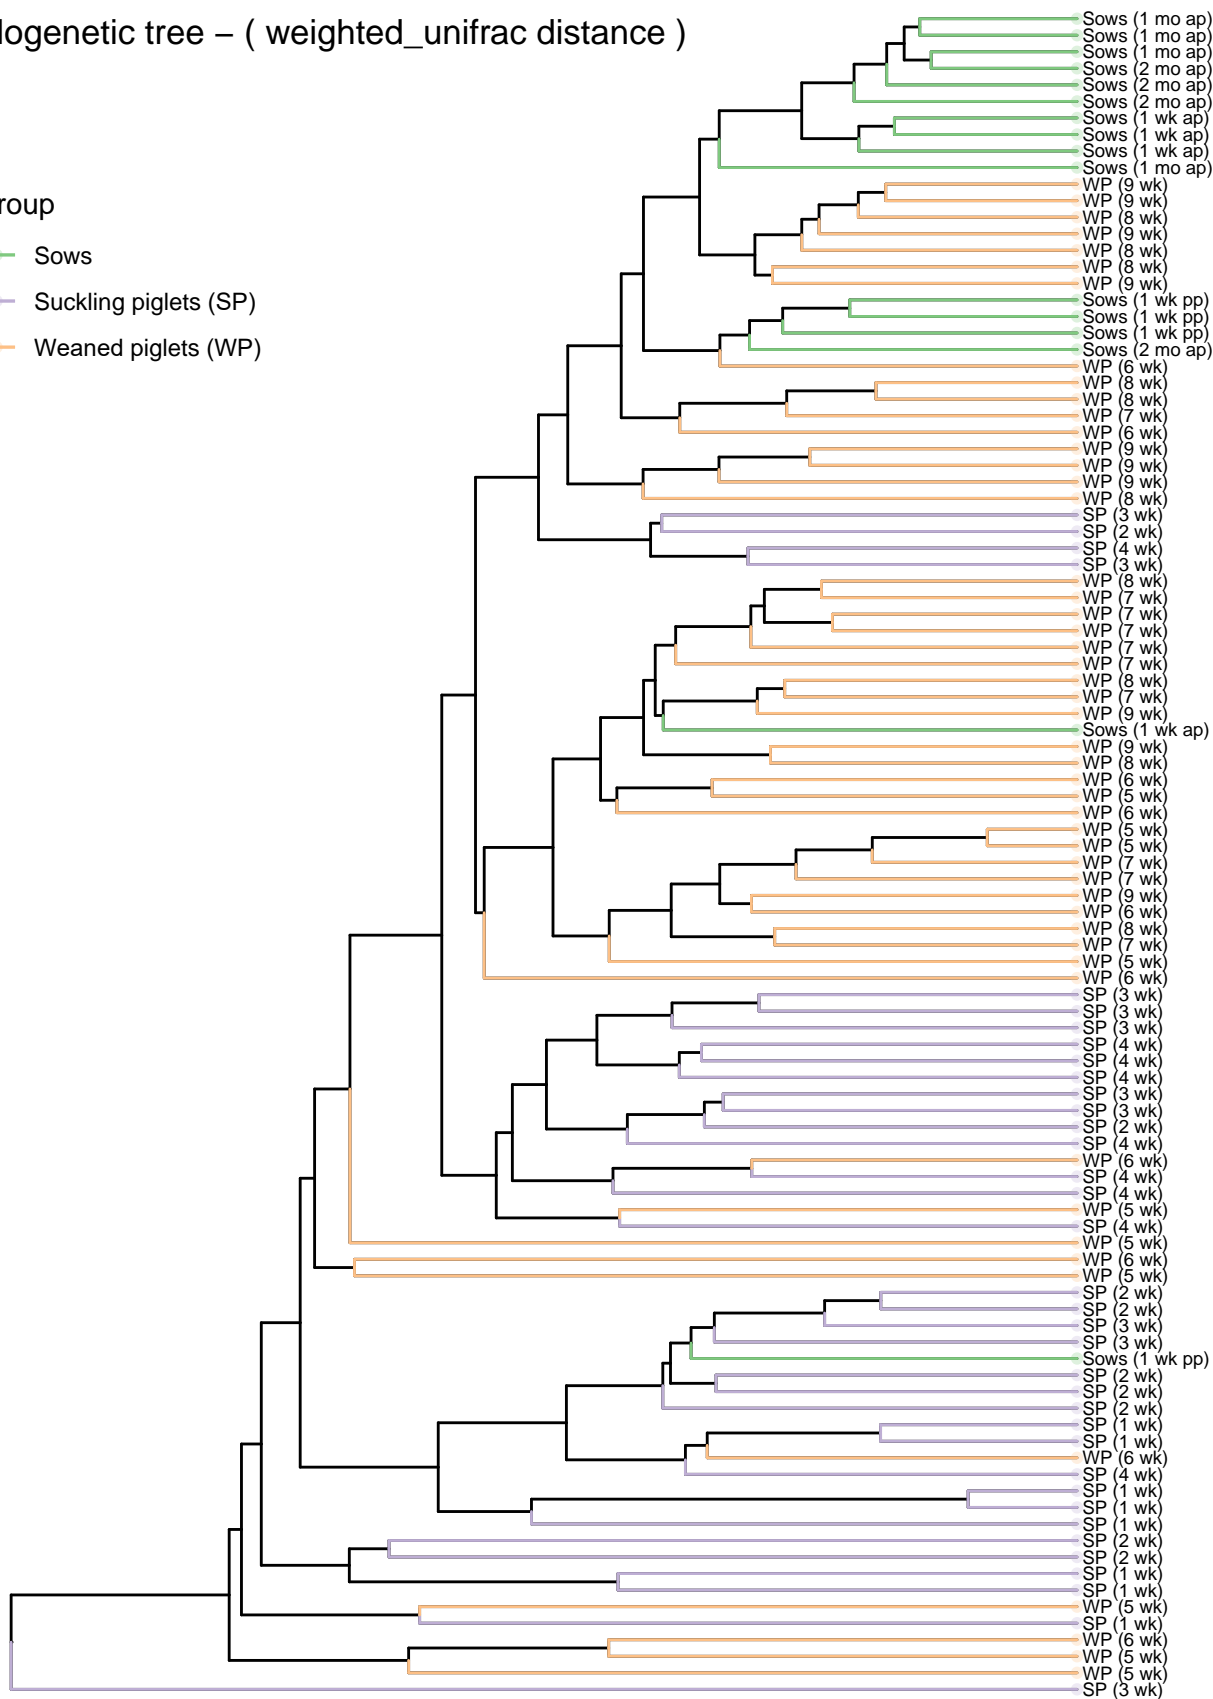

Supplement: s1 [file s1]
